# Supplementary material for: CO 2 fixation: cycloaddition of CO 2 to epoxides using practical metal-free recyclable catalysts
Source: Royal Society of Chemistry journal article supplement (doi:10.1039/d4cc05291a), 2024-11-25
Supplement: d4cc05291a1.pdf [file d4cc05291a1.pdf]

Supporting information for

## **CO<sub>2</sub> fixation: cycloaddition of CO<sub>2</sub> to epoxides by practical metal-free recyclable catalysts**

Wuttichai Natongchai,<sup>a</sup> Daniel Crespy<sup>b</sup> and Valerio D' Elia <sup>\*a</sup>

<sup>a</sup> *Department of Materials Science and Engineering, VISTEC Advanced Laboratory for Environment-Related Inorganic and Organic Syntheses, Vidyasirimedhi Institute of Science and Technology, (VISTEC), Payupnai, WangChan, Rayong 21210, Thailand. email: [valerio.delia@vistec.ac.th](mailto:valerio.delia@vistec.ac.th)*

<sup>b</sup> *Department of Material Science and Engineering, School of Molecular Science and Engineering, Vidyasirimedhi Institute of Science and Technology (VISTEC), Payupnai, WangChan, Rayong 21210, Thailand.*

## Data collection for Scheme 2

The data plotted in Scheme 2 of the manuscript were collected through SciFinder® searches. The searches for reactions a-g in Scheme 2 were performed according to the sketches and criteria shown below. For each reaction, a table with the number of publications per year is provided.

a) Reaction search:

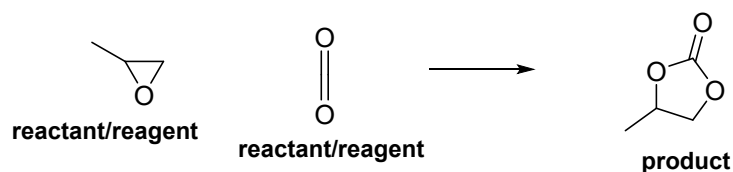

Structure match: As drawn

Number of steps: 1

Document type: Journal (no reviews) or Patent

Publication years: 2019-2023

Number of results:

| Year             | 2019 | 2020 | 2021 | 2022 | 2023 |
|------------------|------|------|------|------|------|
| Journal articles | 217  | 220  | 225  | 237  | 231  |
| Patents          | 53   | 71   | 114  | 82   | 108  |

b) Substances search:

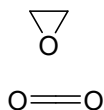

Structure match: Substructure

Reaction role: Product

Document type: Journal (no reviews) or Patent

Publication years: 2019-2023

Number of results:

| Year             | 2019 | 2020 | 2021 | 2022 | 2023 |
|------------------|------|------|------|------|------|
| Journal articles | 60   | 58   | 52   | 69   | 90   |
| Patents          | 81   | 97   | 84   | 112  | 151  |

c) Reaction search

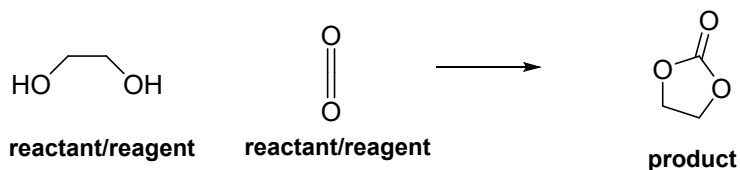

Structure match: Substructure

Number of steps: 1

Document type: Journal (no reviews) or Patent

Publication years: 2019-2023

Number of results:

| Year             | 2019 | 2020 | 2021 | 2022 | 2023 |
|------------------|------|------|------|------|------|
| Journal articles | 53   | 30   | 9    | 51   | 12   |
| Patents          | 9    | 6    | 15   | 1    | 9    |

d) Reaction search

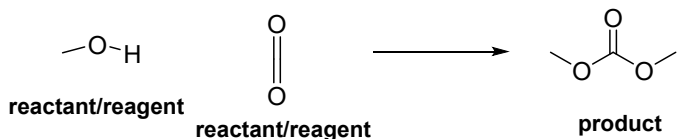

Merged with

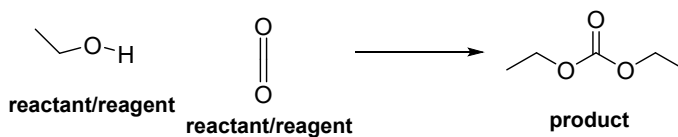

Structure match: As drawn

Number of steps: 1

Document type: Journal or Patent

Publication years: 2019-2023

Number of results:

| Year             | 2019 | 2020 | 2021 | 2022 | 2023 |
|------------------|------|------|------|------|------|
| Journal articles | 27   | 10   | 12   | 22   | 2    |
| Patents          | 10   | 21   | 18   | 13   | 20   |

e) Reaction search

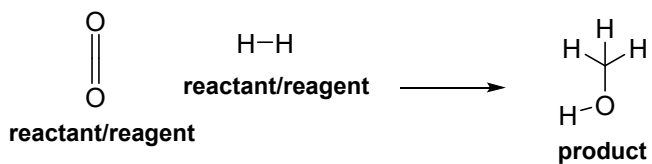

Structure match: As drawn

Number of steps: 1

Document type: Journal or Patent

Publication years: 2019-2023

Number of results:

| Year             | 2019 | 2020 | 2021 | 2022 | 2023 |
|------------------|------|------|------|------|------|
| Journal articles | 79   | 75   | 119  | 90   | 167  |
| Patents          | 85   | 58   | 63   | 74   | 80   |

f) Reaction search

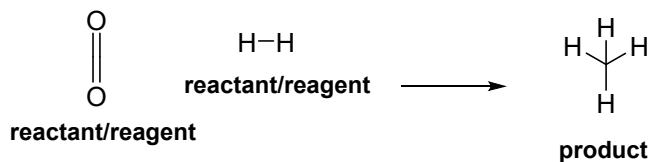

Structure match: As drawn

Number of steps: 1

Document type: Journal or Patent

Publication years: 2019-2023

Number of results:

| Year             | 2019 | 2020 | 2021 | 2022 | 2023 |
|------------------|------|------|------|------|------|
| Journal articles | 74   | 78   | 75   | 77   | 192  |
| Patents          | 59   | 69   | 89   | 56   | 59   |

g) Reaction search

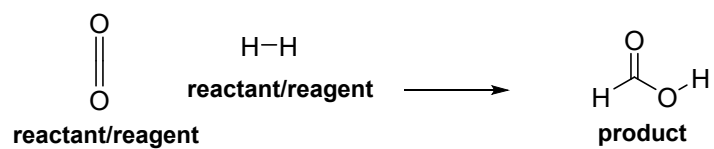

Structure match: Similarity

Number of steps: 1

Document type: Journal or Patent

Publication years: 2019-2023

Number of results:

| Year             | 2019 | 2020 | 2021 | 2022 | 2023 |
|------------------|------|------|------|------|------|
| Journal articles | 92   | 90   | 101  | 53   | 196  |
| Patents          | 21   | 27   | 39   | 25   | 22   |
